# Supplementary material for: Multiple System Atrophy (MSA) and smoking: a meta-analysis and mechanistic insights
Source: publisher site journal article supplement (doi:10.18632/aging.104021), 2020-11-07
Supplement: Supplementary file [file aging-v12i21-104021-supplementary-material-SD1.pdf]

## SUPPLEMENTARY TABLES

**Supplementary Table 1. Search Strategy.**

|    |                                                                                                                                                                                                                                        |
|----|----------------------------------------------------------------------------------------------------------------------------------------------------------------------------------------------------------------------------------------|
| #1 | Multiple System Atrophy[All Fields] OR MSA[All Fields] OR Shy-Drager Syndrome[All Fields] OR Shy Drager Syndrome[All Fields] OR olivopontocerebellar atrophy[All Fields] OR OPCA[All Fields] OR striatonigral degeneration[All Fields] |
| #2 | Smoking[All Fields] OR Nicotine[All Fields] OR Cigar*[All Fields] OR Tobacco[All Fields]                                                                                                                                               |
| #3 | #1 and #2                                                                                                                                                                                                                              |

**Supplementary Table 2. The Joanna Briggs Institute Critical Appraisal Tool for Case-Control Studies.**

| Code             | Were the groups comparable other than the presence of disease in cases or the absence of disease in controls? | Were cases and controls matched appropriately? | Were the same criteria used for identification of cases and controls? | Was exposure measured in a standard, valid and reliable way? | Was exposure measured in the same way for cases and controls? | Were confounding factors identified? | Were strategies to deal with confounding factors stated? | Were outcomes assessed in a standard, valid and reliable way for cases and controls? | Was the exposure period of interest long enough to be meaningful? | Was appropriate statistical analysis used? |
|------------------|---------------------------------------------------------------------------------------------------------------|------------------------------------------------|-----------------------------------------------------------------------|--------------------------------------------------------------|---------------------------------------------------------------|--------------------------------------|----------------------------------------------------------|--------------------------------------------------------------------------------------|-------------------------------------------------------------------|--------------------------------------------|
| Zhou 2016        | Yes                                                                                                           | Yes                                            | Yes                                                                   | No                                                           | Yes                                                           | Yes                                  | Yes                                                      | Yes                                                                                  | Unclear                                                           | Yes                                        |
| Seo 2010         | Yes                                                                                                           | Yes                                            | Yes                                                                   | No                                                           | Yes                                                           | Yes                                  | Yes                                                      | Yes                                                                                  | Yes                                                               | Yes                                        |
| Vanacore 2000    | Yes                                                                                                           | Yes                                            | Yes                                                                   | No                                                           | Yes                                                           | Yes                                  | Yes                                                      | Yes                                                                                  | Yes                                                               | Yes                                        |
| Chrysostome 2004 | Yes                                                                                                           | Yes                                            | Yes                                                                   | No                                                           | Yes                                                           | No                                   | No                                                       | Yes                                                                                  | Unclear                                                           | Yes                                        |
| Vidal 2008       | Yes                                                                                                           | Yes                                            | Yes                                                                   | No                                                           | Yes                                                           | Yes                                  | Yes                                                      | Yes                                                                                  | Unclear                                                           | Yes                                        |

**Supplementary Table 3. The Newcastle-Ottawa Quality Assessment Scale for Case-Control Studies.**

| Code             | Selection           |                             |                       |                        | Comparability | Exposure                  |                         |              | Total |
|------------------|---------------------|-----------------------------|-----------------------|------------------------|---------------|---------------------------|-------------------------|--------------|-------|
|                  | Definition of Cases | Representativeness of Cases | Selection of Controls | Definition of Controls |               | Ascertainment of Exposure | Method of Ascertainment | Non-Response |       |
| Zhou 2016        | 1                   | 1                           | 1                     | 1                      | 2             | 0                         | 1                       | 0            | 7     |
| Seo 2010         | 1                   | 1                           | 1                     | 1                      | 2             | 0                         | 1                       | 0            | 7     |
| Vanacore 2000    | 1                   | 1                           | 1                     | 1                      | 2             | 0                         | 1                       | 0            | 7     |
| Chrysostome 2004 | 1                   | 1                           | 1                     | 1                      | 1             | 0                         | 1                       | 0            | 6     |
| Vidal 2008       | 1                   | 1                           | 1                     | 1                      | 2             | 0                         | 1                       | 0            | 7     |
